# Supplementary material
Source: publisher site journal article supplement (https://www.dovepress.com/article/430942)
Supplement: Supplementary file 1 [file get_supplementary_file.php]

**Patient Preferences For Anaesthesiologist Attire During Preoperative Visits**

Xiaohan Xu, MD; Zhilong Lu, MD; Zijia Liu, MD; Yue Han, MD; Yuelun Zhang, PhD; Le Shen MD, PhD

***Corresponding author**:Zijia Liu, liu-zj02@126.com; Le Shen, shenle@pumch.cn; Department of Anesthesiology, Peking Union Medical College Hospital, Chinese Academy of Medical sciences, Peking Union Medical College, Beijing, 100730, China

You are volunteered to participate in this survey. Your answers can help us better understand patient preferences for anaesthesiologist attire during preoperative visits. Please answer the questions based on your real thoughts. There are no right or wrong answers. Your answers will not affect your clinical treatments. No personally identifiable information will be collected. It will take no more than 5 minutes to complete the questionnaire. Thank you for your time!

***Page 1***

1. **Have you ever received a preoperative visit before?**

- Yes
- No

1. **Your gender:**

- Male
- Female

1. **Your age group:**

- 18~30
- 31~45
- 46~60
- 61~75
- 76 or older

1. **Your highest educational degree：**

- Junior high school and below
- Senior high school
- Junior college/Undergraduate collage
- Graduate college and above

1. **Please select your region:**

- North China
- Central China
- East China
- South China
- Northeast China
- Northwest China
- Southwest China

1. **Your department：**

- General surgery
- Gynaecology
- Orthopaedics
- Thoracic surgery
- Urology
- Ear-nose-throat

***Page 2***

Please rate each combination from 5 aspects, with the highest score of 10 and the lowest score of 1. [Photographs of male and female models wearing six combinations of anaesthesiologist attire]

1. **Scrubs in a green coat**

- Professionalism: 1 2 3 4 5 6 7 8 9 10
- Clinical experience: 1 2 3 4 5 6 7 8 9 10
- Work attitude: 1 2 3 4 5 6 7 8 9 10
- Approachability: 1 2 3 4 5 6 7 8 9 10
- Caring for patients: 1 2 3 4 5 6 7 8 9 10

1. **Scrubs in a white coat**

- Professionalism: 1 2 3 4 5 6 7 8 9 10
- Clinical experience: 1 2 3 4 5 6 7 8 9 10
- Work attitude: 1 2 3 4 5 6 7 8 9 10
- Approachability: 1 2 3 4 5 6 7 8 9 10
- Caring for patients: 1 2 3 4 5 6 7 8 9 10

1. **Business in a white coat buttoned**

- Professionalism: 1 2 3 4 5 6 7 8 9 10
- Clinical experience: 1 2 3 4 5 6 7 8 9 10
- Work attitude: 1 2 3 4 5 6 7 8 9 10
- Approachability: 1 2 3 4 5 6 7 8 9 10
- Caring for patients: 1 2 3 4 5 6 7 8 9 10

1. **Business in a white coat unbuttoned**

- Professionalism: 1 2 3 4 5 6 7 8 9 10
- Clinical experience: 1 2 3 4 5 6 7 8 9 10
- Work attitude: 1 2 3 4 5 6 7 8 9 10
- Approachability: 1 2 3 4 5 6 7 8 9 10
- Caring for patients: 1 2 3 4 5 6 7 8 9 10

1. **Casual in a white coat buttoned**

- Professionalism: 1 2 3 4 5 6 7 8 9 10
- Clinical experience: 1 2 3 4 5 6 7 8 9 10
- Work attitude: 1 2 3 4 5 6 7 8 9 10
- Approachability: 1 2 3 4 5 6 7 8 9 10
- Caring for patients: 1 2 3 4 5 6 7 8 9 10

1. **Casual in a white coat unbuttoned**

- Professionalism: 1 2 3 4 5 6 7 8 9 10
- Clinical experience: 1 2 3 4 5 6 7 8 9 10
- Work attitude: 1 2 3 4 5 6 7 8 9 10
- Approachability: 1 2 3 4 5 6 7 8 9 10
- Caring for patients: 1 2 3 4 5 6 7 8 9 10

1. **Please make a comprehensive evaluation of the above six combinations of anaesthesiologist attire in the preoperative visit.**

- Your most preferred attire number :1 2 3 4 5 6
- Your least preferred attire number: 1 2 3 4 5 6

1. **I think anaesthesiologists should fasten all buttons when wearing white coats or green coats.**

- Strongly agree
- Agree
- Neither agree nor disagree
- Disagree
- Strongly disagree

***Page 3***

1. **Anaesthesiologists often wear personalized operating caps. Do you think there are any differences between personalized operating caps and disposable operating caps from the following aspects?** [Photographs of male and female models wearing a disposable cap and a personalized cap]

|  | Disposable cap | Personalized cap | No difference |
| --- | --- | --- | --- |
| Professionalism |  |  |  |
| Clinical experience |  |  |  |
| Approachability |  |  |  |

1. **Which cap would you prefer in the preoperative visit?**

- Disposable cap
- Personalized cap
- No difference

***Page 4***

1. **I will trust anaesthesiologists more if they dress appropriately in the preoperative visit.**

- Strongly agree
- Agree
- Neither agree nor disagree
- Disagree
- Strongly disagree
